# Supplementary material for: Application of a modified NanoSuit method for SEM observation of diverse parasites: Toward integrative taxonomic analyses
Source: Research Square preprint supplement (doi:10.21203/rs.3.rs-8032605/v1), 2025-11-17
Supplement: Supplementary file 1 [file 886353b1b56557aee902e846.xlsx]

## Sheet: Sheet1
					Table 1. List of parasite samples examined by the NanoSuit method alongside fixation conditions, host information, and comparison with conventional SEM preparation methods. For each taxonomic group, representative genera and host species are provided together with the fixative used in this study, the reference describing conventional SEM preparation (species and developmental stage), and the dryi…
					Sample information in this study (NanoSuit method)				Reference information		Result
					Taxonomic group	Species (Gen., sp., stage※)	Host	Fixative	Reference for comparison (Sp. and stage)	Drying method
					Arthropods	Haemaphysalis sp.	Nyctereutes viverrinus :Mammalia	99 % ethanol	Ishigaki et al., 2012 (Haemaphysalis flava)	No fixation / coating※※	◎
					Nematodes	Gongylonema pulchrum	Sus scrofa :Mammalia	99 % ethanol	Makouloutou et al., 2013 (Gongylonema pulchrum)	t-butyl-alcohol freeze-drying	◎
						Gnathostoma sp.	Sus scrofa :Mammalia	99 % ethanol	Díaz-Camacho et al., 2009 (Gnathostoma turgidum)	CO2 critical point	◎
						Gnathostoma sp. (L3 larva)	Gloydius blomhoffii :Reptalia	99 % ethanol	Pinheiro et al., 2017 (Gnathostoma sp. L3 larva)	CO2 critical point	〇
						Ascaris suum (egg)	Sus scrofa domesticus :Mammalia	10% formalin	Borba et al., 2021 (Capillariidae spp. egg)	CO2 critical point	◎
					Platyhelminths	Aspidogastridae gen. sp.	Sinanodonta sp. :Mollusca	99 % ethanol	Snyder et Tkach, 2007 (Neosychnocotyle maggiae)	HMDS	〇
						Echinostoma sp.	Corvus corone :Aves	99 % ethanol	Chai et al., 2011 (Echinostoma revolutum)	CO2 critical point	〇
						Anoplocephala perfoliata	Equus caballus :Mammalia	10% formalin	Mondal et al., 2023 (Hymenolepis diminuta)	graded aceton	◎
					Acanthocephalans	Sphaerirostris sp.	Corvus corone :Aves	99 % ethanol	Ionita et al., 2008 ( acanthocephalans )	CO2 critical point	〇
					Apicomplexans	Sarcocystis sybillensis (cyst)	Cervus nippon :Mammalia	99 % ethanol	Gjerde et al., 2017 (Sarcocystis spp. cyst)	HMDS	◎
					Ciliates	Trichodina sp.	Hynobius dunni :Amphibia	99 % ethanol	Zhou et al., 2021 (Trichodina lishuiensis)	CO2 critical point	〇
					Myxozoans	Myxidium sp.	Hynobius kimurae :Amphibia	10% formalin	Hartigan et al., 2012 (Cystodiscus axonis spore)	CO2 critical point	〇
									※Unless otherwise specified, adult stages were used. ※※Ticks have been reported to be observable alive without fixation or pretreatment.
